# Supplementary material
Source: publisher figshare collection journal article supplement (https://gsapubs.figshare.com/ndownloader/files/22745567)

TABLE DR1. SUMMURY OF THE CHANNEL'S CHARACTERISTICS

| Channel characteristics*          | Units | Channel a | Channel b | Channel c |
|-----------------------------------|-------|-----------|-----------|-----------|
| Slope upward of landmark 4        | %     | 0.66      | 0.91      | -         |
| Slope between landmarks 3 and 4   | %     | 0.54      | 0.8       | 0.9       |
| Slope between landmarks 2 and 3   | %     | 0.66      | 0.96      | 1.1       |
| Slope between landmarks 1 and 2   | %     | 2         | 2.5       | 2.7       |
| Slope downward of landmark 1      | %     | 0.54      | 0.55      | 1         |
| Peak of maximum slope             | %     | 4         | 6.1       | 8.2       |
| Distance peak of slope-thrust     | km    | 2.7       | 3.5       | 3         |
| Width of the frontal limb         | km    | 2         | 2.5       | 7         |
| Zone of slope >1.9%               | km    | 35        | 25        | 10        |
| Deepening through the active belt | m     | 580       | 375       | 263       |

\*Landmarks 1, 2, 3 and 4 refer to landmarks of Figure 2.

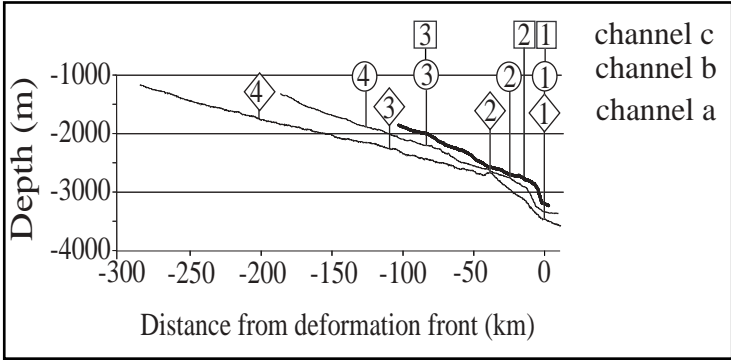

Supplement: Supplementary file 1 [file 22745567]
